# Supplementary material
Source: publisher figshare collection journal article supplement (https://acs.figshare.com/ndownloader/files/26422843)
Supplement: Supplementary file 1 [file 26422843]

## Supporting Information

### **Nucleolin Targeted DNA Nanotube for Precise Cancer Therapy through FRET-Indicated Telomerase Responsiveness**

Chun Hong Li,<sup>†</sup> Wen Yi Lv,<sup>†</sup> Yuan Yan,<sup>‡</sup> Fei Fan Yang,<sup>‡</sup> Shu Jun Zhen<sup>\*,‡</sup> and Cheng Zhi Huang<sup>\*,†</sup>

<sup>†</sup> Key Laboratory of Luminescence Analysis and Molecular Sensing (Southwest University), Ministry of Education, College of Pharmaceutical Sciences, Southwest University, Chongqing 400715, P. R. China. E-mail: [chengzhi@swu.edu.cn](mailto:chengzhi@swu.edu.cn); Fax: +86 2368367257; Tel: +86 2368254659

<sup>‡</sup> Key Laboratory of Luminescent and Real-Time Analytical System (Southwest University), Chongqing Science and Technology Bureau, College of Chemistry and Chemical Engineering, Southwest University, Chongqing 400715, P. R. China. E-mail: [zsj@swu.edu.cn](mailto:zsj@swu.edu.cn); Fax: +86 2368367257; Tel: +86 2368254059

## Table of Contents

|        |      |                                                                              |     |
|--------|------|------------------------------------------------------------------------------|-----|
| Table  | S1.  | Oligonucleotide sequences for DNA nanosheet/nanotube.....                    | S3  |
| Figure | S1.  | The cell viability of RTA-DNA conjugates.....                                | S5  |
| Figure | S2.  | Detailed schematic diagrams of DNA nanosheet.....                            | S5  |
| Figure | S3.  | Gel characterization of DNA nanosheet-RTA.....                               | S6  |
| Figure | S4.  | Schematic diagram of DNA nanotube in response to telomerase.....             | S6  |
| Figure | S5.  | Verification of the telomerase activity.....                                 | S7  |
| Figure | S6.  | Dose-dependent inhibition of telomerase activity.....                        | S8  |
| Figure | S7.  | Verification of telomerase extracts response to DNA nanotube.....            | S8  |
| Figure | S8.  | Time optimization of DNA nanotube in response of telomerase.....             | S9  |
| Figure | S9.  | The relationship between $\Delta F_A/F_D$ and the number of MCF-7 cells..... | S9  |
| Figure | S10. | Selectivity of telomerase detection.....                                     | S10 |
| Figure | S11. | Verification of nucleolin expression level on various cells.....             | S11 |
| Figure | S12. | The specificity of telomerase response in different cells.....               | S11 |
| Figure | S13. | Optimization of incubation time of DNA nanotube in cells.....                | S12 |
| Figure | S14. | Cytotoxicity of AS1411/nanotube/RTA in various cell lines.....               | S12 |



**Table S1. Oligonucleotide sequences for DNA nanosheet/nanotube.**

| Name | Sequence (5'to 3')                                                                 |
|------|------------------------------------------------------------------------------------|
| F1   | TGTGTGTGTGTGTTCCAGCGCTTACGGCGCCAGTGGCGCCTTGGTG<br>ATGGCATGGATGCGACGAGATCACCTCCTTC  |
| F2   | TGTGTGTGTGTGTATGTGAGGCCCGTATCTGATGCTAAAACCGTAC<br>GAAGCGTGCAAATCCGTCCGAGAGTATGGAT  |
| F3   | TTTTTTTTTTTTATCGTGCTTCACGTTCCGGCGATAATGTGATCCTAGC<br>AACCTACTCTATCCACCACGGGTTGGAC  |
| F4   | TGTGTGTGTGTGTAGGTATGGATGTCGGAATTATGGGTCCCTGAGC<br>TTGCACTTTGTTACAGGTGAAAGAAGATGT   |
| F5   | TGTGTGTGTGTGTTTAGTTCCGGACCCTCCCGCATTCTAGGAAGTG<br>AATTGACATTATAATCGTCACCCACACCGCC  |
| F6   | TTTTTTTTTTTTACACGGGTTCAAGAACCTGTCCTCCGCCCAAAGGA<br>GTTTCGTCTACTGATTAACCTTCGACTACGG |
| F7   | ATCGCCGCCGGACGTAGAGCCTAATGTGGGCAGTGACTACGAACT<br>GACCAGATGAGGGCGGTTG               |
| F8   | CGGCGCTGTTAATATTCCATTTATCATTTCTTTGGGTAGCTTAGGA<br>GTGTTTCGCACAAGCACAC              |
| F9   | CACACTACGGAGGCCCATCTCATAATGGTTTATGGGATTTGTGTG<br>AGTCTAACCTACCGAGGC                |
| F10  | TTTTTTTTTTTTACCAAGGCGCCCAAAGTGCAAGTT                                               |
| F11  | ACTGGCGCCGTAAGCGCTGGATACGGTTTTAGAATGTCAATTCAC<br>ATCTTCTTTCACCTGTGAA               |
| F12  | CATCAGATACGGGCCTCACATGGATCACATTAAGACGAACTCCGG<br>CGGTGTGGGTGACGATTAT               |
| F13  | TTTTTTTTTTTTCTCAGGGACCCTTCGTAGTCACTT                                               |
| F14  | ATAATTCCGACATCCATACCTACTTCCTAGAATAAGCTACCCACAA<br>CCGCCCTCATCTGGTCAG               |

---

|      |                                                                       |
|------|-----------------------------------------------------------------------|
| F15  | TGCGGGAGGGTCCGGAAC TAATTTGGGCGGAGACAAATCCCATGT<br>GTGCTTGTGCGAACACTCC |
| F16  | TCCATGCCATCTT                                                         |
| F17  | TGCACGCTTCGGAAGGAGGTGATCTCGTCGCAAATCCGTCGAGCA<br>GAGTT                |
| F18  | GTAGGTTGCTAATCCATACTCTCGGACGGATTAATCCGTCGAGCA<br>GAGTT                |
| F19  | TTTGCCCACATTA                                                         |
| F20  | <b>Cy5</b> -TTAGGGTTAGGGGGCTCTACGTCCGGCGGCGATAAGAAATGA<br>TA          |
| F21  | <b>Cy5</b> -TTAGGGTTAGGGAATGGAATATTAACAGCGCCGAAACCATTA<br>TG          |
| F22  | TCGCCGAACGTGAAGCACGATTTTTTTTTTTTTTTTTTTTTTCCGT<br>AGTCGAAGTTAATCAGT   |
| F23  | GACAGGTTCTTGAACCCGTGTTTTTTTTTTTTTTTTTTTTTGCCTC<br>GGTAGGTTAGACTCAC    |
| F24  | TTTTTGTCCAACCCGTGGTGGATAGAAATCCGTCGAGCAGAGTT                          |
| F25  | <b>Cy5</b> -TTAGGGTTAGGGAGATGGGGCCTCCGTAGTGTGTTTTT                    |
| F26  | CCCTAACCTAACCC (T-cy3) AACTCTGCTCGACGGATT                             |
| F27  | ACACACACACACATTTTTTTTTTT-SH                                           |
| F28  | AAAAAAAAAAAGGTGGTGGTGGTGTGGTGGTGGTGG                                  |
| F281 | AAAAAAAAAAAAAAAAAAAAAAAAAAAAAAAAAAAAA                                 |
| F29  | GGTGGTGGTGGTGTGGTGGTGGTGGTGGT-FAM                                     |

---

## Supplementary Figures

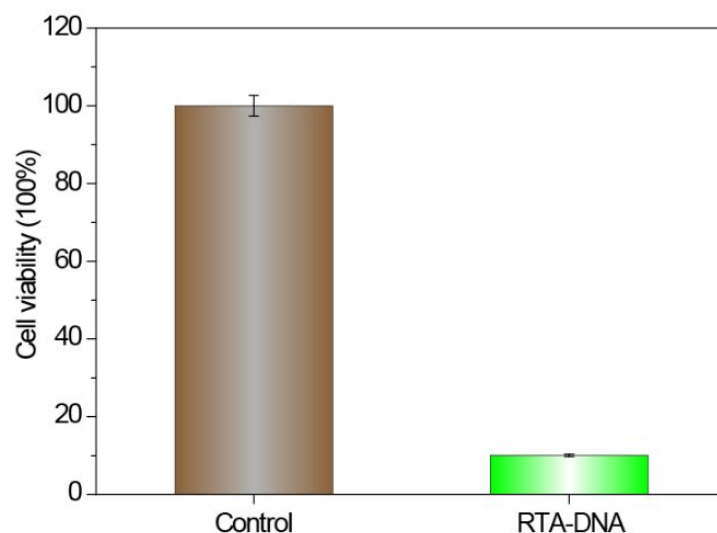

**Figure S1.** The cell viability of RTA-DNA conjugates. HeLa cells were seeded in a 96-well plate at a density of  $1 \times 10^4$  cells per well and incubated for 24 h at 37 °C and 5% CO<sub>2</sub>. After that 40 nM RTA-DNA conjugates was added and incubated for further 24h. The RTA-DNA conjugates exhibit excellent cell toxicity, indicating the feasibility of RTA for tumor therapy.

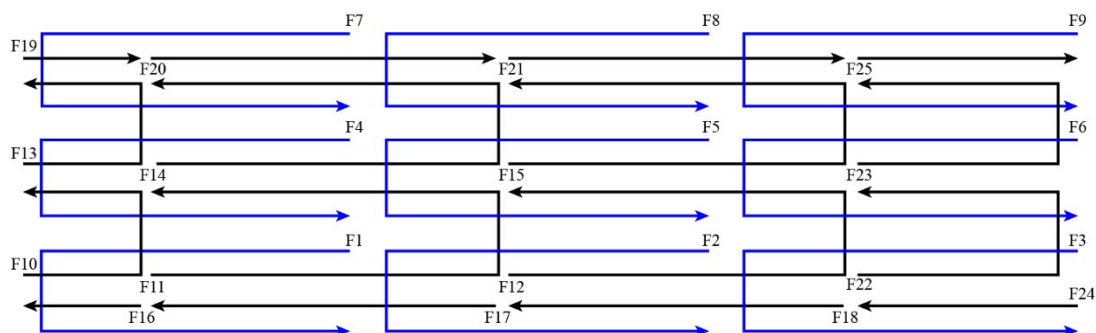

**Figure S2.** Detailed schematic diagrams of DNA nanosheet.

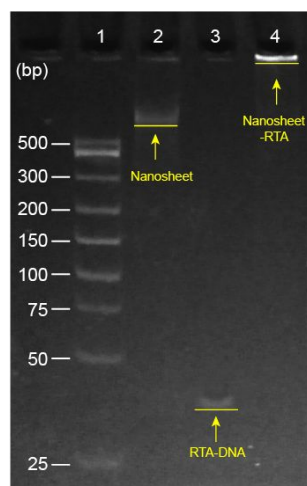

**Figure S3.** Gel characterization of DNA nanosheet-RTA. The band of DNA nanosheet-RTA was distinct retarded than that of pure DNA nanosheet on the 8% PAGE, indicating the successful loading of RTA on DNA nanosheet. Lane 1–4: DNA marker, DNA nanosheet, RTA-DNA conjugates and DNA nanosheet-RTA.

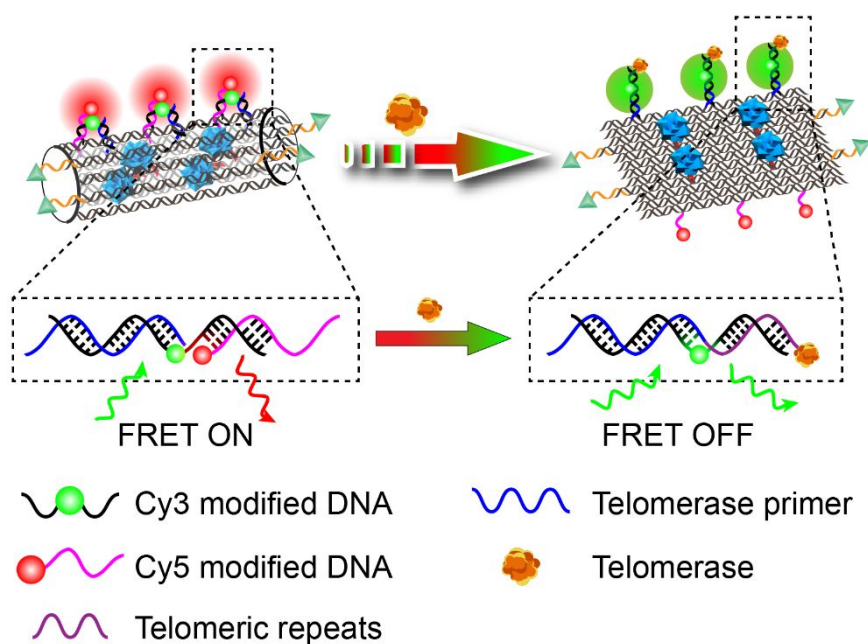

**Figure S4.** Schematic diagram of DNA nanotube in response to telomerase.

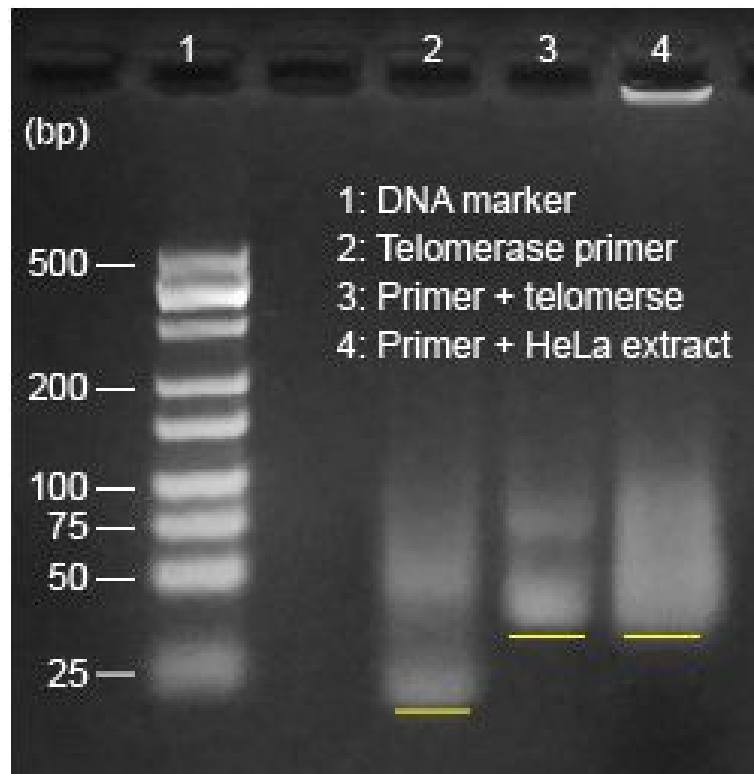

**Figure S5.** Verification of the telomerase activity. A 11 bp telomerase primer strand was reacted with pure telomerase, telomerase extraction from HeLa cells and incubated at 37 °C for 1 h. A distinct retarded band appeared in the case of pure telomerase and HeLa lysate in the 2% agarose gel electrophoresis compare to the telomerase primer strands alone, indicating that the telomerase was successfully extracted from HeLa cells. Lane 1–4: DNA marker, telomerase primer stand, telomerase primer incubated with telomerase, telomerase primer incubated with HeLa cells extract.



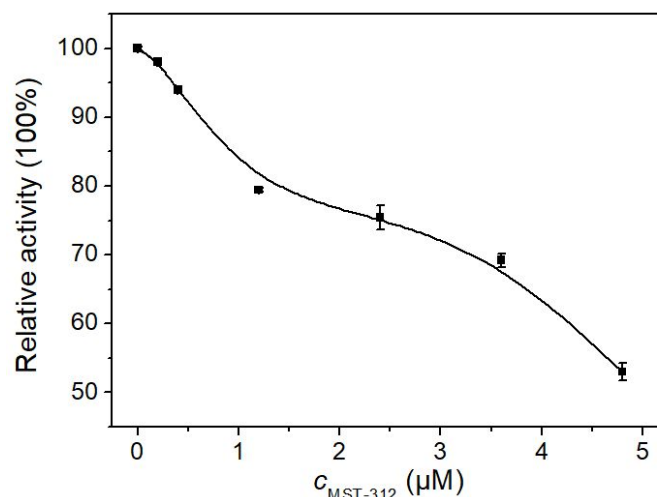

**Figure S6.** Dose-dependent inhibition of telomerase activity by telomerase inhibitor in HeLa cells. The telomerase inhibitor, N, N'-1, 3-phenylenebis-[2,3-dihydroxy-benzamide] (MST-312) was used to explore the inhibition effect upon telomerase activity. After incubation with 0 – 4.8  $\mu\text{M}$  MST-312 for 62 h, the HeLa cells were collected and telomerase was extracted to measure its activity. The relative activity of telomerase decreases with the increase of MST-312 concentration, indicating that the DNA nanotube could applied for the recognition and response of telomerase.

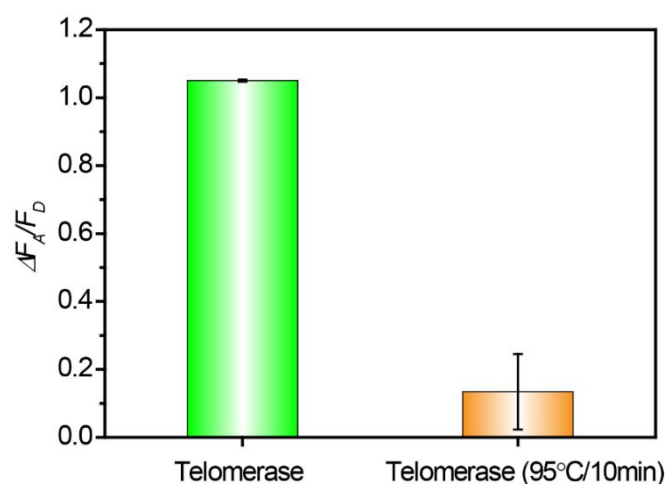

**Figure S7.** Verification of telomerase extracts response to DNA nanotube. The DNA nanotube was treated with HeLa cells lysate or heat-inactive Hela lysate. Experimental Conditions: DNA nanotube, 50 nM; dNTP, 200  $\mu\text{M}$ ; HeLa cells, 2400

cells; incubation at 37 °C for 1h.

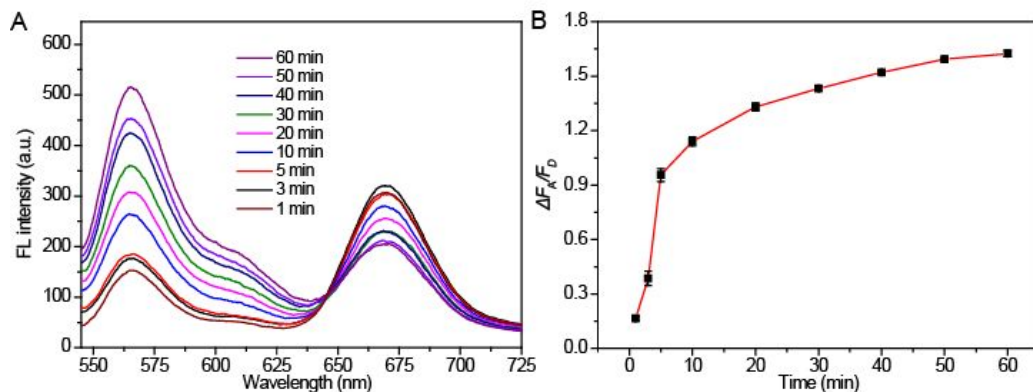

**Figure S8.** Time optimization of DNA nanotube in response of telomerase. (A) Fluorescence spectra of 50 nM DNA nanotube after incubating with telomerase from HeLa cells at different time ( $\lambda_{\text{ex}} = 525$  nm,  $\lambda_{\text{em}} = 570$  nm and 670 nm). (B) Relationship between the relative acceptor/donor ratio ( $\Delta F_A/F_D$ ) and different incubation time.

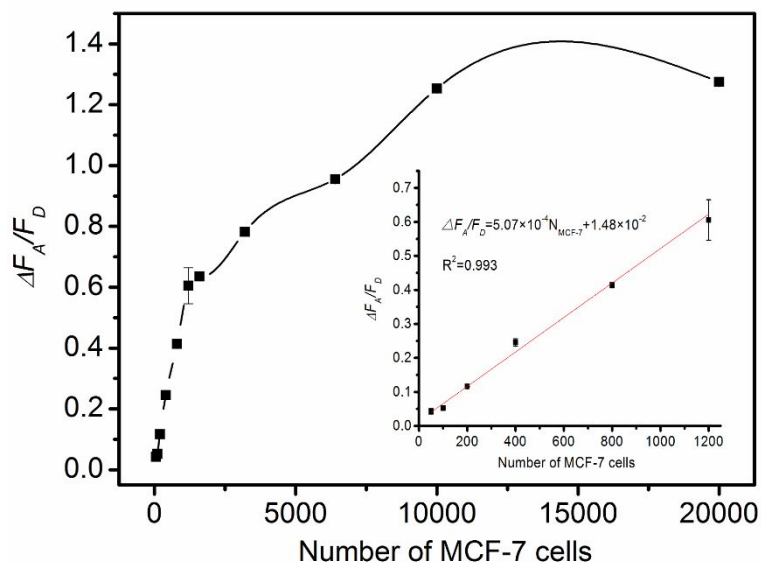

**Figure S9.** The relationship between  $\Delta F_A/F_D$  and the number of MCF-7 cells. The results demonstrated the positive correlation between  $\Delta F_A/F_D$  and the number of MCF-7 cells, the limit of detection (LOD,  $3\sigma$ ) was calculated to be 64 MCF-7 cells with the linear relationship ranges from 100-2400 cells.

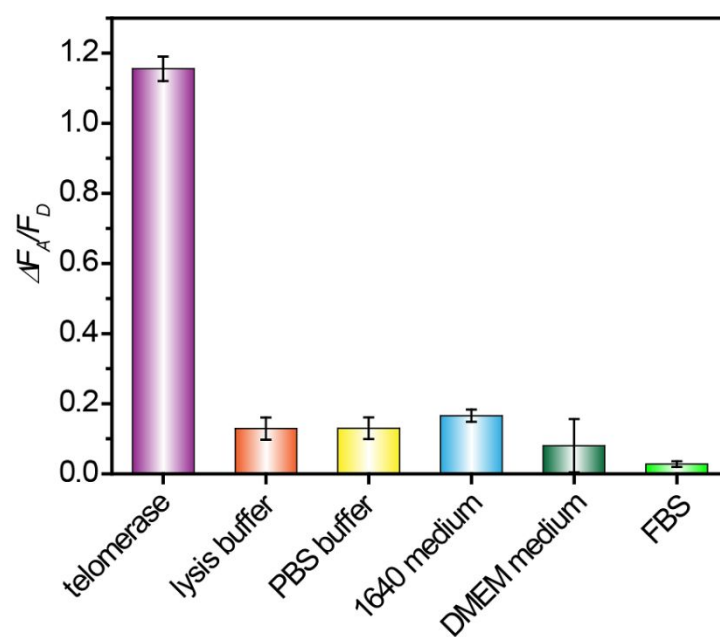

**Figure S10.** Selectivity of telomerase detection in the presence of various interfering substances. Equal amount of DNA nanotube was co-incubated with different media including lysis buffer, PBS buffer, DMEM medium, 1640 medium and FBS at 37 °C for 1h.

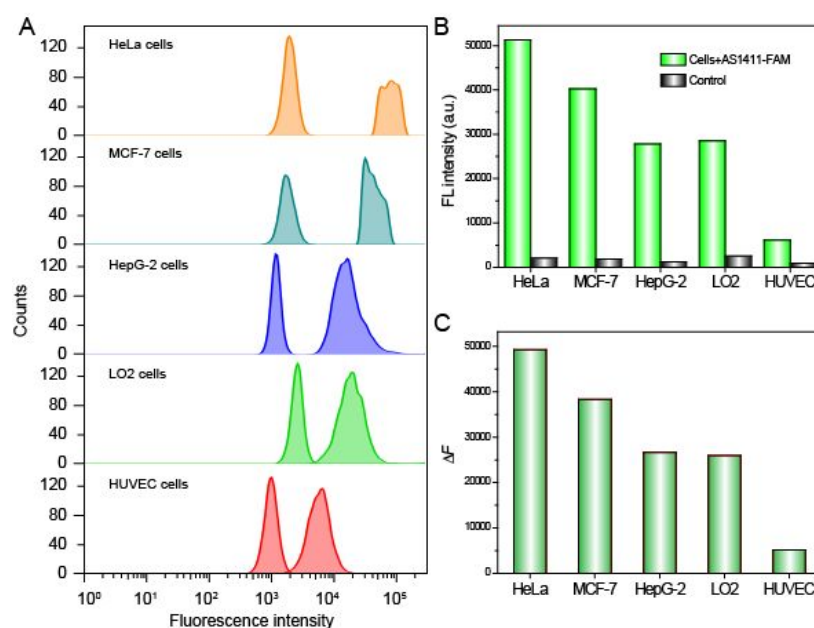

**Figure S11.** Verification of nucleolin expression level on various tumor cells and normal cells. (A) Flow cytometric histograms of various cell lines after incubated with or without FAM-labeled AS1411 (AS1411-FAM). The left line in each histogram correspond to the control groups of HeLa, MCF-7, HepG-2, LO2 and HUVEC cells, respectively. (B) The quantified profiles of mean fluorescence intensity in various cell lines treated with or without AS1411-FAM by flow cytometry. (C) The relative fluorescence intensity related to nucleolin expression in various cells.

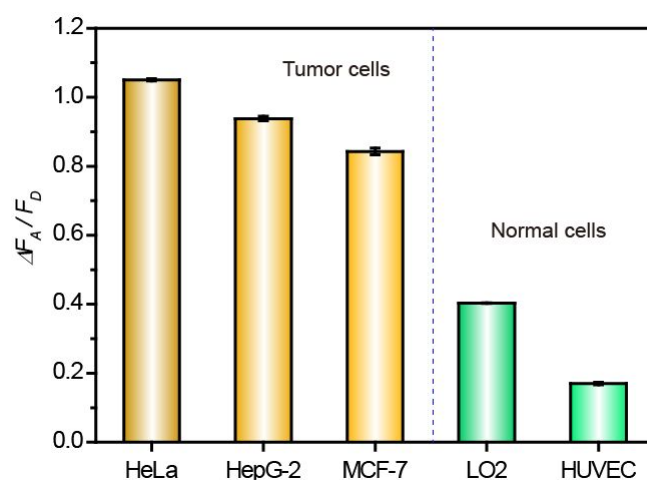

**Figure S12.** The specificity of telomerase response in different cells. Experimental conditions: DNA nanotube, 50 nM; dNTPs, 200  $\mu$ M; HeLa, HepG-2, MCF-7, LO2, HUVEC cells, 2400 cells.

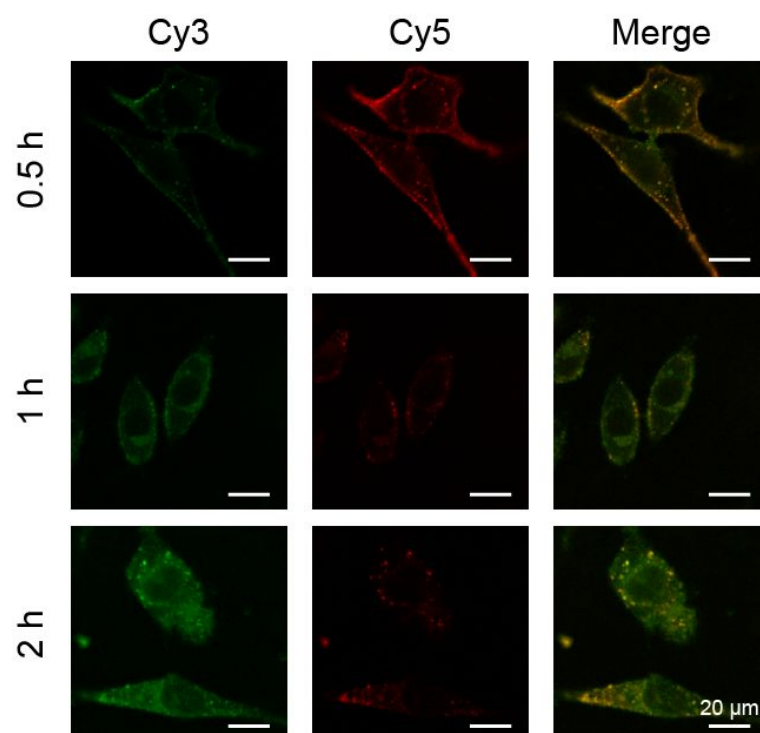

**Figure S13** Optimization of incubation time of DNA nanotube in cells. Fluorescent confocal microscopy images of HeLa cells after incubation with AS1411/nanotube (20 nM) for different time (0.5, 1, 2 h).

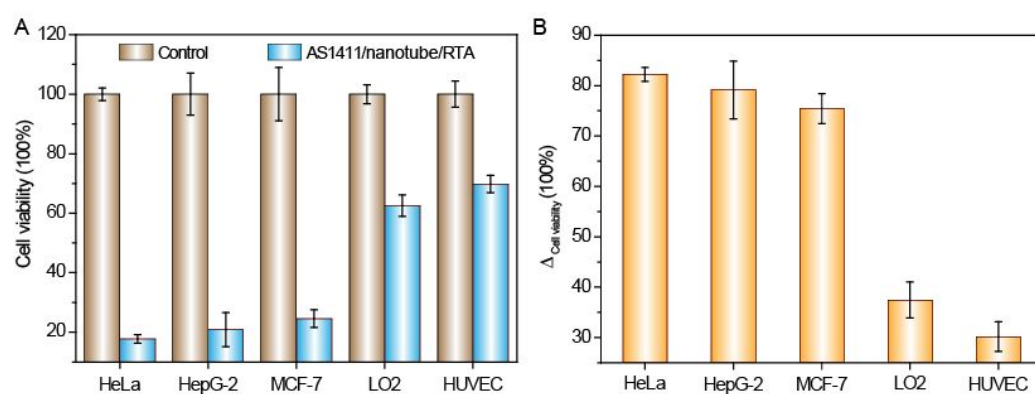

**Figure S14.** Cytotoxicity comparison of AS1411/nanotube/RTA in various cell lines. (A-B) The absolute and relative cytotoxicity of AS1411/nanotube/RTA on HepG-2, MCF-7, HeLa, LO2, and HUVEC cells.
